# Supplementary material for: Metal cations as inorganic structure-directing agents during the synthesis of phillipsite and tobermorite
Source: Royal Society of Chemistry journal article supplement (doi:10.1039/d2re00466f), 2023-01-01
Supplement: d2re00466f1.pdf [file d2re00466f1.pdf]

**SUPPORTING INFORMATION**

**Metal Cations as Inorganic Structure-Directing Agents during the  
Synthesis of Phillipsite and Tobermorite**

Juan Carlos Vega-Vila<sup>1,2</sup>, Advait Holkar<sup>2</sup>, Ross A. Arnold<sup>1,2,3</sup>, Dale Prentice<sup>1,3</sup>, Shiqi Dong<sup>1,3</sup>,  
Longwen Tang<sup>3</sup>, Erika Callagon La Plante<sup>4</sup>, Kirk Ellison<sup>5</sup>, Aditya Kumar<sup>6</sup>, Mathieu Bauchy<sup>3</sup>,  
Samanvaya Srivastava<sup>1,2,8\*</sup>, Gaurav Sant<sup>1,3,7,8</sup>, Dante Simonetti<sup>1,2\*</sup>

<sup>1</sup> Institute for Carbon Management (ICM), University of California, Los Angeles, CA, USA

<sup>2</sup> Department of Chemical and Biomolecular Engineering, University of California, Los Angeles,  
CA, USA

<sup>3</sup> Department of Civil and Environmental Engineering, University of California, Los Angeles,  
CA, USA

<sup>4</sup> Department of Materials Science and Engineering, University of Texas at Arlington, TX, USA

<sup>5</sup> Electric Power Research Institute (EPRI), Charlotte, NC, USA

<sup>6</sup> Department of Materials Science and Engineering, Missouri University of Science and  
Technology, Rolla, MO, USA

<sup>7</sup> Department of Materials Science and Engineering, University of California, Los Angeles, CA,  
USA

<sup>8</sup> California Nanosystems Institute (CNSI), University of California, Los Angeles, CA, USA

\* Corresponding author. E-mail: [dasimonetti@ucla.edu](mailto:dasimonetti@ucla.edu); [samsri@ucla.edu](mailto:samsri@ucla.edu)

\*Corresponding author. E-mail: [dasimonetti@ucla.edu](mailto:dasimonetti@ucla.edu)

### S.1. Synthesis of silicate hydrates at varied charge ratios.

Table S.1 encloses the molar compositions of the synthesis precursors for all samples discussed in the main text. The alkaline content (OH/Si) was kept constant in experiments performed within the same series (e.g., crystallized at the same temperature) to minimize morphological and topological differences associated with changes in pH during hydrothermal treatments.

**Table S.1.** Molar composition of synthesis precursors in growth solutions prior to hydrothermal treatments at 373 and 393 K.

| Sample                     | C.R. <sup>a</sup> | Na   | K    | Ca   | Al   | Si | H <sub>2</sub> O | OH/Si |
|----------------------------|-------------------|------|------|------|------|----|------------------|-------|
| PHI-TOB-373-0 <sup>b</sup> | 0.00              | 1.41 | 0.39 | -    | 0.11 | 1  | 270.27           | 1.47  |
| PHI-TOB-373-0              | 0.00              | 1.41 | 0.39 | -    | 0.11 | 1  | 17.59            | 1.47  |
| PHI-TOB-373-0.25           | 0.25              | 1.06 | 0.29 | 0.22 | 0.11 | 1  | 17.59            | 2.66  |
| PHI-TOB-373-0.50           | 0.50              | 0.70 | 0.19 | 0.45 | 0.11 | 1  | 17.59            | 2.63  |
| PHI-TOB-373-0.75           | 0.75              | 0.35 | 0.10 | 0.67 | 0.11 | 1  | 17.59            | 2.61  |
| PHI-TOB-373-1.00           | 1.00              | -    | -    | 0.90 | 0.11 | 1  | 17.59            | 2.58  |
| PHI-TOB-393-0.00           | 0.00              | 0.99 | 0.51 | -    | 0.05 | 1  | 18               | 2.13  |
| PHI-TOB-393-0.30           | 0.30              | 0.70 | 0.36 | 0.23 | 0.05 | 1  | 18               | 2.10  |
| PHI-TOB-393-0.50           | 0.50              | 0.50 | 0.26 | 0.38 | 0.05 | 1  | 18               | 2.07  |
| PHI-TOB-393-0.80           | 0.80              | 0.20 | 0.10 | 0.60 | 0.05 | 1  | 18               | 2.04  |
| PHI-TOB-393-1.00           | 1.00              | -    | -    | 0.83 | -    | 1  | 18               | 2.02  |

<sup>a</sup> Fraction of calcium with respect to the total metal cations in the synthesis gel (i.e.,  $(2 \times \text{Ca}^{2+})/(\text{K}^{+} + \text{Na}^{+} + (2 \times \text{Ca}^{2+}))$ ).

<sup>b</sup> Synthesis performed at varied water content to lower the total silicon concentration to 0.2 M.

## 45 S.2. Characterization of physicochemical properties of phillipsite and tobermorite samples.

46 N<sub>2</sub> adsorption isotherms (77 K) are compiled in Figures S.1–S.6 on all phillipsite and  
47 tobermorite samples. Samples are referred to as PHI-TOB-X-Y, where X is the temperature of the  
48 hydrothermal treatment and Y is the charge ratio (fraction of the cationic content provided by  
49 calcium, Ca/(K + Na + Ca)). Micropore volumes (cm<sup>3</sup> g<sup>-1</sup>) were determined from semi-log  
50 derivative analysis of the isotherm ( $\partial(V_{\text{ads}}/\text{g})/\partial(\log(P/P_0))$  vs.  $\log(P/P_0)$ ), where the first maximum  
51 represents the micropore filling transition and the subsequent minimum represents the end of  
52 micropore filling. We note that the micropore volumes (Fig. 2, main text) of samples with mixed  
53 phillipsite and tobermorite phases are within the range of the pure phases, highlighting the ability  
54 of the single-step synthesis protocols reported here to crystallize materials with structural  
55 characteristics of both, phillipsite zeolites and tobermorite silicate hydrates. The hysteresis  
56 observed in the desorption portion of the isotherms indicate the presence of mesoporous cavities  
57 within PHI-TOB samples.

58

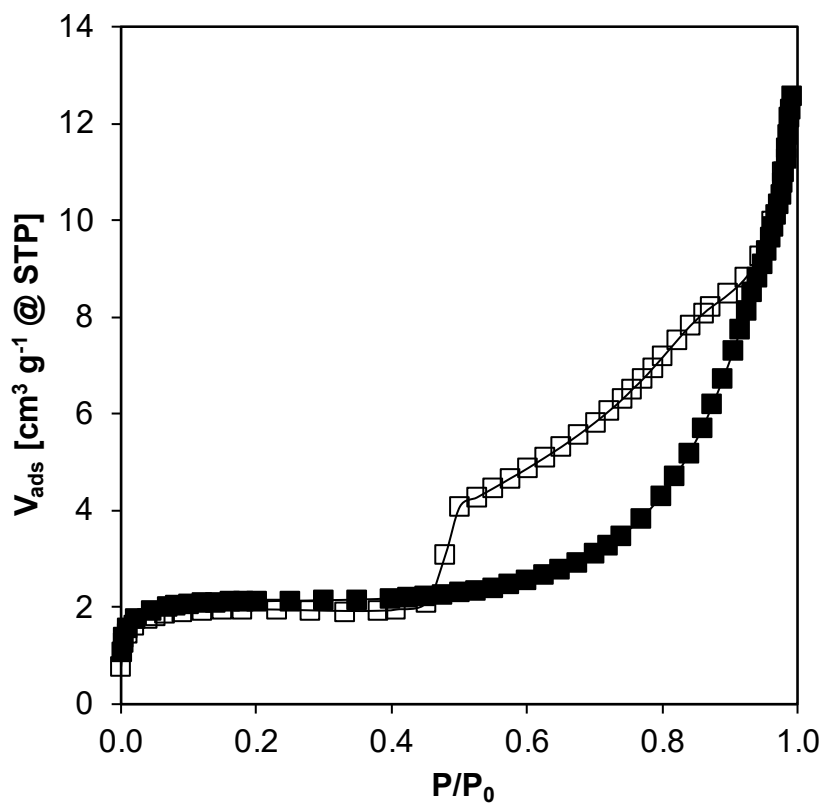

**Figure S.1.** N<sub>2</sub> adsorption (■) and desorption (□) isotherms (77 K) of PHI-TOB-373-0.

59

60

61

62

63

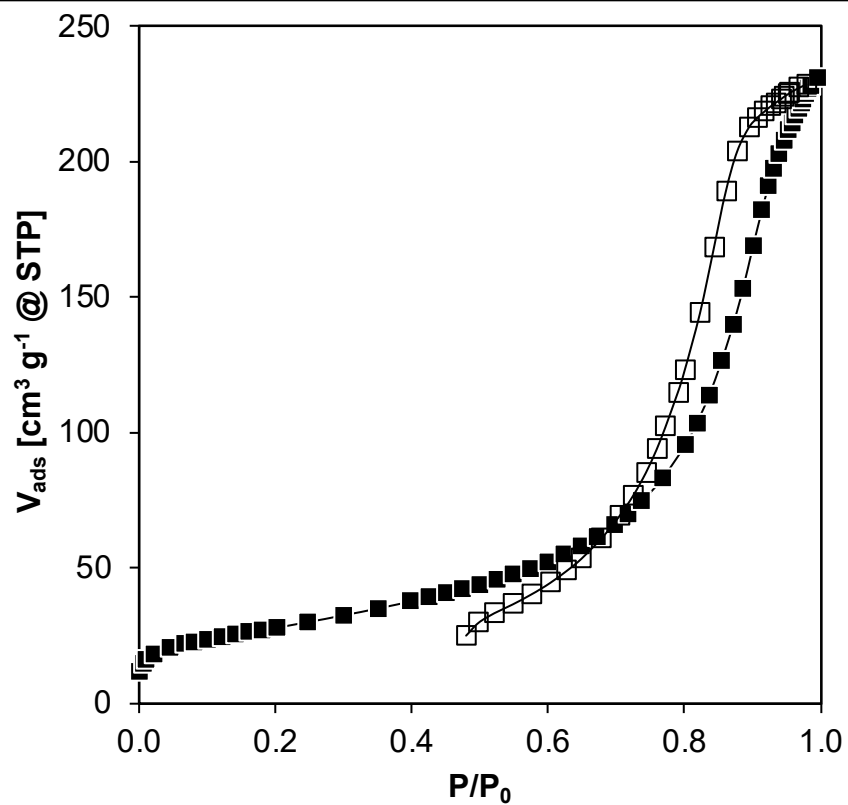

**Figure S.2.**  $\text{N}_2$  adsorption (■) and desorption (□) isotherms (77 K) of PHI-TOB-373-0.25.

64  
65

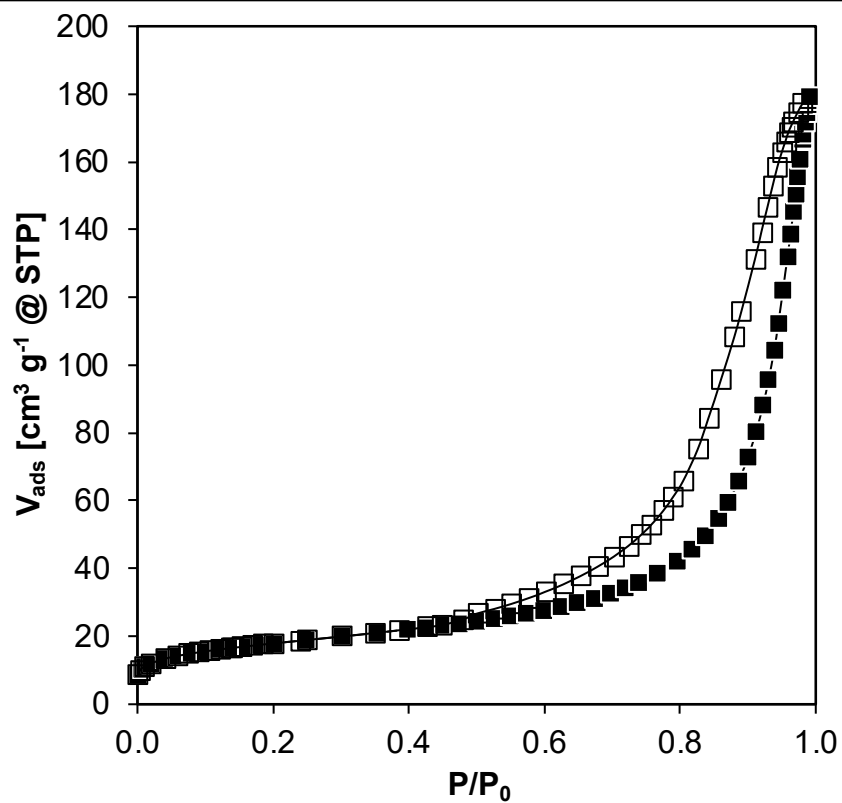

**Figure S.3.** N<sub>2</sub> adsorption (■) and desorption (□) isotherms (77 K) of PHI-TOB-373-0.50.

66

67

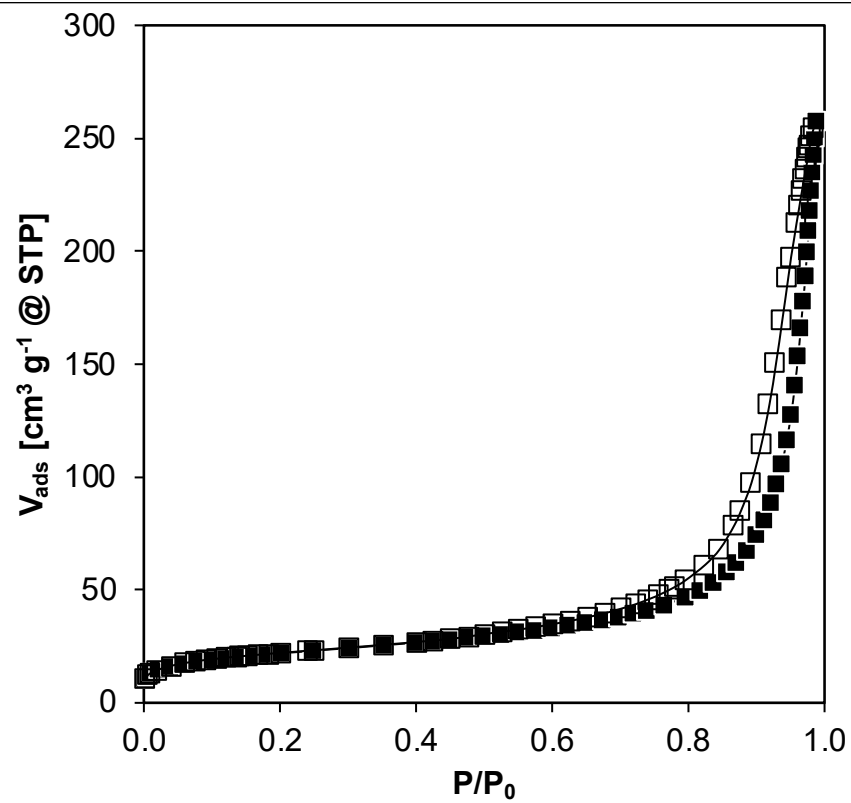

**Figure S.4.** N<sub>2</sub> adsorption (■) and desorption (□) isotherms (77 K) of PHI-TOB-373-0.75.

68  
69

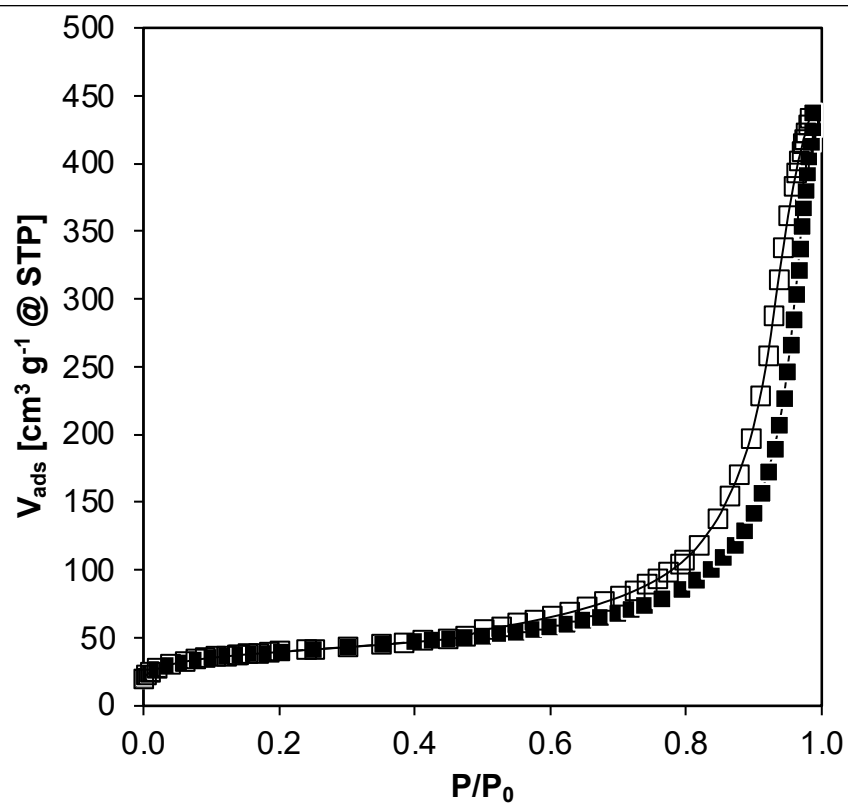

**Figure S.5.** N<sub>2</sub> adsorption (■) and desorption (□) isotherms (77 K) of PHI-TOB-393-0.80.

70  
71  
72

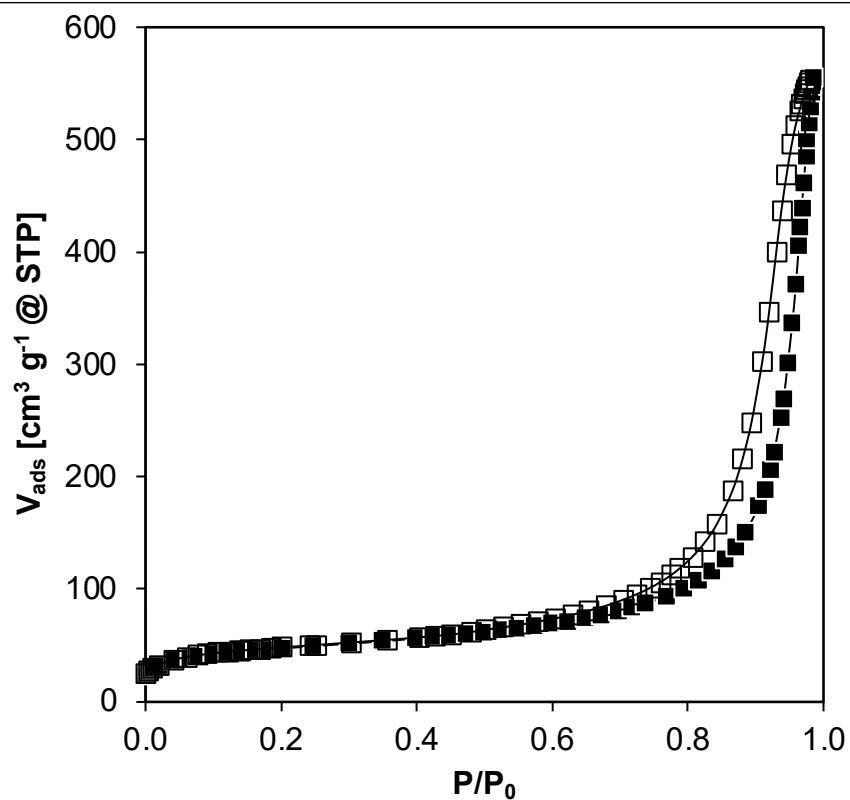

**Figure S.6.** N<sub>2</sub> adsorption (■) and desorption (□) isotherms (77 K) of PHI-TOB-393-1.

### 75 S.3. Morphological signatures of phillipsite zeolites and tobermorite silicate hydrates.

76 Transmission electron microscope (TEM) images were taken on PHI-TOB-373-0 (Figure  
77 S.7) and PHI-TOB-393-1 (Figure S.8). Phillipsite samples (Figure S.7, PHI-TOB-373-0) show  
78 planar surfaces that agglomerate to form thick plates, in accordance with their typical prism-like  
79 to lath-like morphology with “cracking” along cleavage surfaces.<sup>1</sup> Defined planar surfaces, as well  
80 as agglomeration of needle-like crystals, however, are observed for tobermorite samples (Figure  
81 S.8). These observation corroborate the presence of tobermorite silicate hydrates as they  
82 traditionally exhibit an acicular (e.g., needle-like) morphology that extend among one axis as  
83 crystallization processes take place.<sup>2-4</sup>

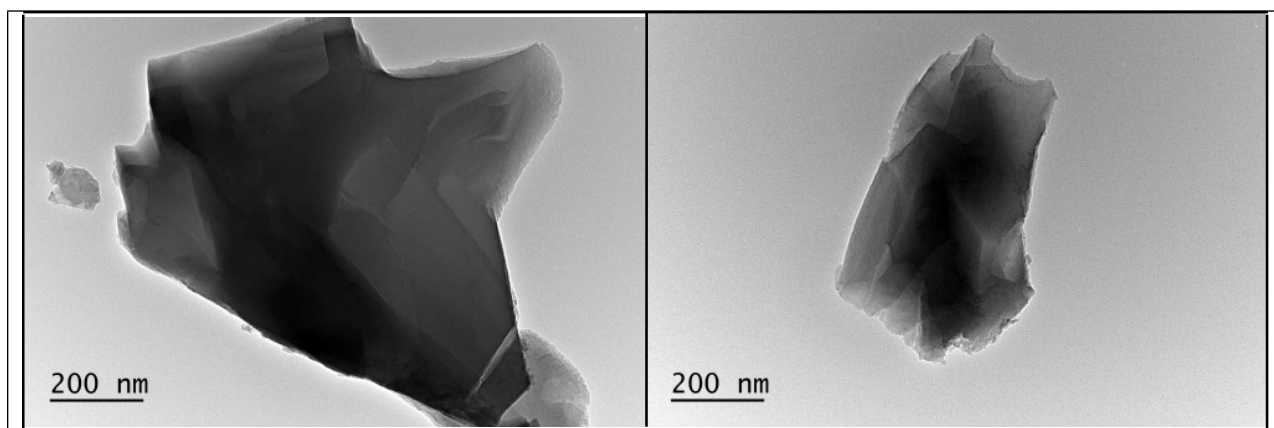

**Figure S.7.** TEM images of PHI-TOB-373-0.

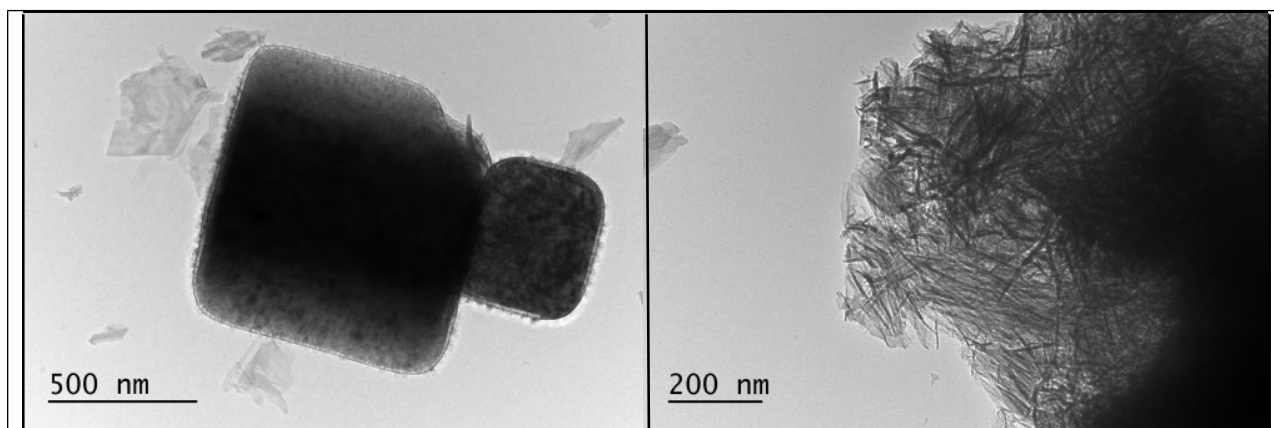

**Figure S.8.** TEM images of PHI-TOB-393-1.

#### 86 S.4. References.

- 87 (1) Mumpton, F. A.; Ormsby, W. C. Morphology of Zeolites in Sedimentary Rocks by Scanning  
88 Electron Microscopy. *Clays and Clay Minerals* **1976**, 24 (1), 1–23.  
89 <https://doi.org/10.1346/CCMN.1976.0240101>.
- 90 (2) Diez-Garcia, M.; Gaitero, J. J.; Dolado, J. S.; Aymonier, C. Ultra-Fast Supercritical  
91 Hydrothermal Synthesis of Tobermorite under Thermodynamically Metastable Conditions.  
92 *Angewandte Chemie-International Edition* **2017**, 56 (12), 3162–3167.  
93 <https://doi.org/10.1002/anie.201611858>.
- 94 (3) Huang, X.; Jiang, D.; Tan, S. Novel Hydrothermal Synthesis Method for Tobermorite Fibers  
95 and Investigation on Their Thermal Stability. *Materials Research Bulletin* **2002**, 37 (11),  
96 1885–1892. [https://doi.org/10.1016/S0025-5408\(02\)00854-1](https://doi.org/10.1016/S0025-5408(02)00854-1).
- 97 (4) Galvánková, L.; Másilko, J.; Solný, T.; Štěpánková, E. Tobermorite Synthesis Under  
98 Hydrothermal Conditions. *Procedia Engineering* **2016**, 151, 100–107.  
99 <https://doi.org/10.1016/j.proeng.2016.07.394>.
- 100
